# Supplementary material
Source: Springer Nature journal article supplement (http://www.springermedizin.de/resource/supplementary/12955_2009_585_MOESM3_ESM.pdf/9560762)

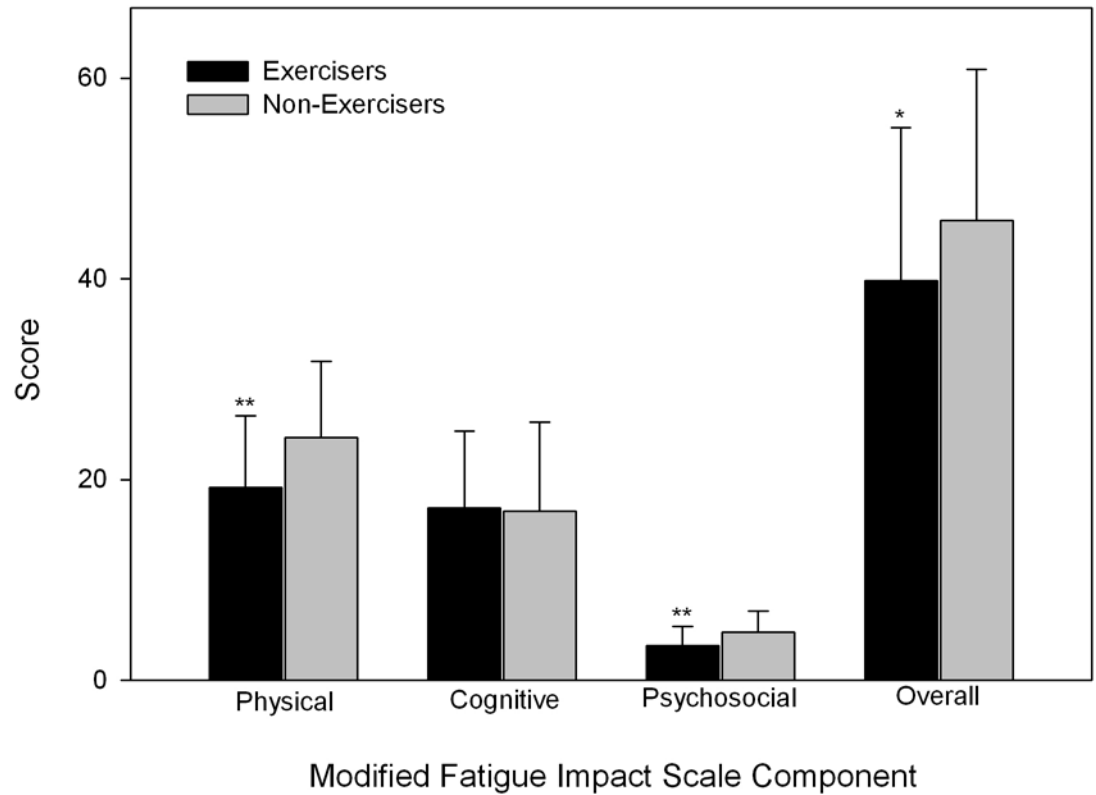

Supplement: MOESM3 [file 9560762]
